# Supplementary material for: Synthesis and controllable oxidation of monodisperse cobalt-doped wüstite nanoparticles and their core–shell stability and exchange-bias stabilization
Source: Royal Society of Chemistry journal article supplement (doi:10.1039/c5nr02969d), 2015-01-01
Supplement: c5nr02969d1.pdf [file c5nr02969d1.pdf]

## Supplementary Materials

### Synthesis and Controllable Oxidation of Monodisperse Cobalt-Doped Wüstite Nanoparticles and their Core-Shell Stability and Exchange-Bias Stabilization

Chih-Jung Chen,<sup>a,b</sup> Ray-Kuang Chiang,<sup>\*a</sup> Saeed Kamali,<sup>\*c</sup> and Sue-Lein Wang<sup>b</sup>

<sup>a</sup> Nanomaterials Laboratory, Far East University, Hsing-Shih, Tainan 74448, Taiwan

<sup>b</sup> Department of Chemistry, National Tsing Hua University, Hsinchu 30013, Taiwan

<sup>c</sup> MABE Department, University of Tennessee Space Institute, Tullahoma, TN 37388, USA

\*Correspondence should be addressed to [rkc.chem@msa.hinet.net](mailto:rkc.chem@msa.hinet.net) and [skamail@utsi.edu](mailto:skamail@utsi.edu)

**Table S1.** Structural parameters of 12.5 nm and 19 nm 20h-oxidized Co-doped FeO NPs.

| Diameters (nm) | Core diameter (nm) | Shell thickness (nm) | Core volume (nm <sup>3</sup> ) | Shell volume (nm <sup>3</sup> ) | Shell-to-core volume ratio |
|----------------|--------------------|----------------------|--------------------------------|---------------------------------|----------------------------|
| 12.5           | 4.5                | 4                    | 91                             | 1862                            | 20.4                       |
| 19             | 11                 | 4                    | 1331                           | 5528                            | 4.2                        |

**Table S2.** Magnetic parameters of 12.5 nm and 19 nm 20h-oxidized Co-doped FeO NPs.

| Temp. \ Size | 12.5 nm             |                        |                        | 19 nm               |                        |                        |
|--------------|---------------------|------------------------|------------------------|---------------------|------------------------|------------------------|
|              | H <sub>E</sub> (Oe) | V <sub>S</sub> (emu/g) | FC-H <sub>C</sub> (Oe) | H <sub>E</sub> (Oe) | V <sub>S</sub> (emu/g) | FC-H <sub>C</sub> (Oe) |
| 5 K          | 4302                | 2.11                   | 13754                  | 2500                | 6.3                    | 16096                  |
| 100 K        | 290                 | 0.89                   | 1896                   | 644                 | 1.12                   | 9917                   |
| 150 K        | 10                  | 0.02                   | 1204                   | 169                 | 0.36                   | 6024                   |
| 200 K        | 0                   | 0                      | 415                    | 36                  | 0.16                   | 3346                   |
| 250 K        | 0                   | 0                      | 312                    | 0                   | 0                      | 1350                   |
| 300 K        | 0                   | 0                      | 0                      | 0                   | 0                      | 601                    |

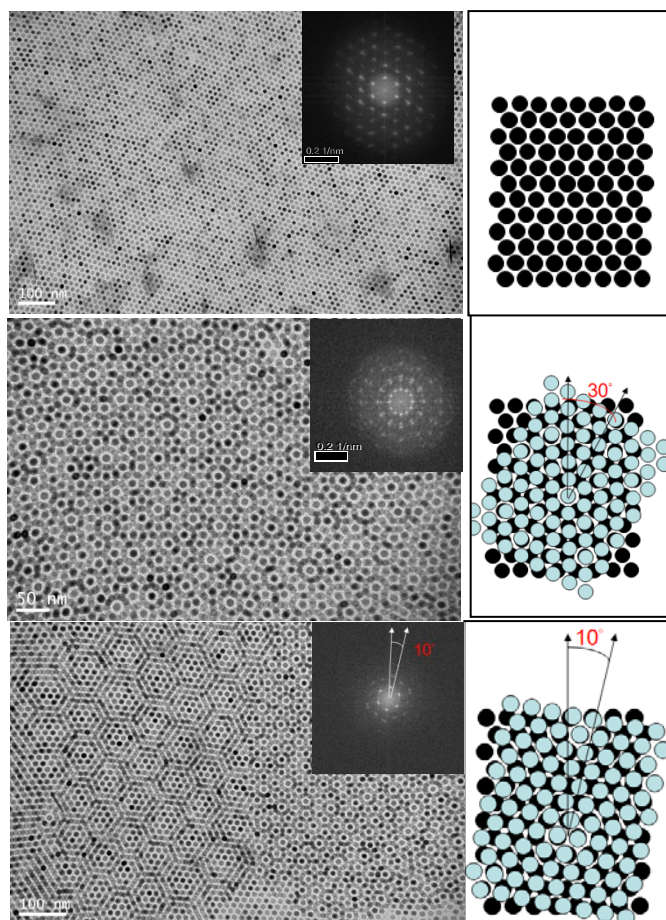

**Fig. S1.** A typical multi-layered hexagonal-close-packed structure of CWT NPs.

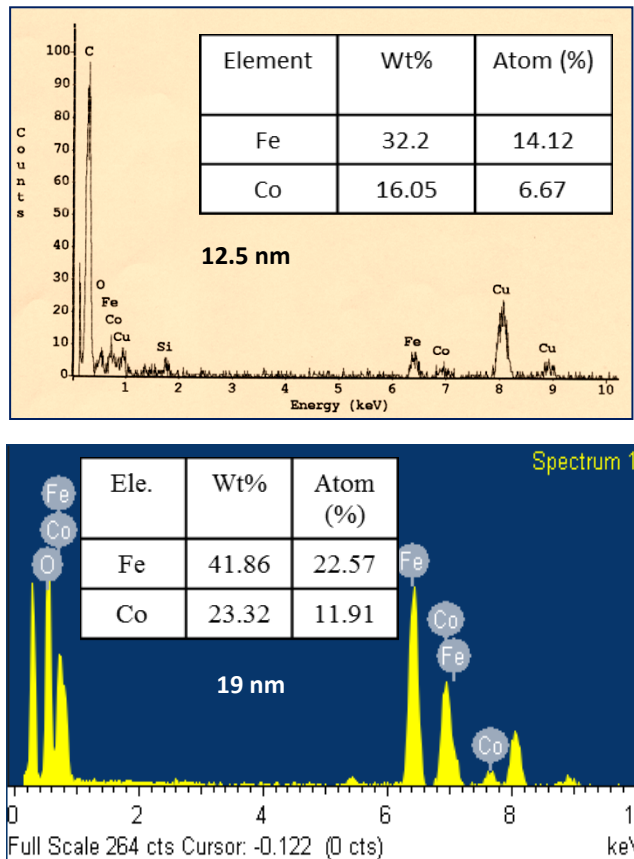

**Fig. S2.** The elemental analysis of cobalt in the CWT NPs and showed the Fe-to-Co ratio to be around 2:1 by ICP for the NP product with a size of 12.5 nm and 19 nm, respectively.

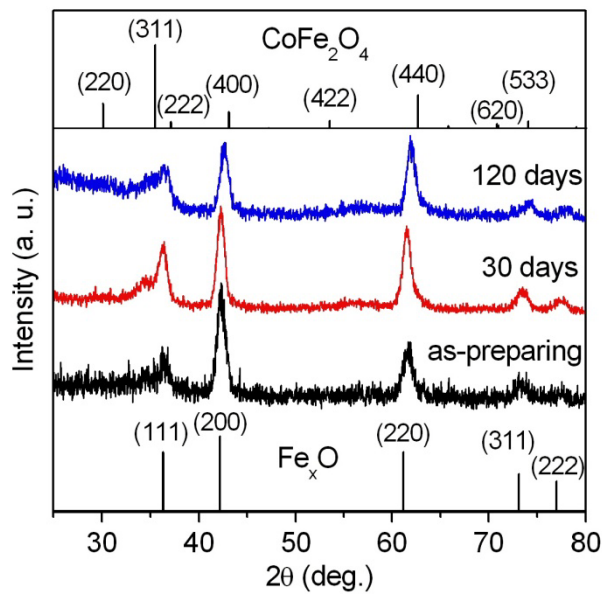

**Fig. S3.** XRD patterns of products of ambient oxidation.

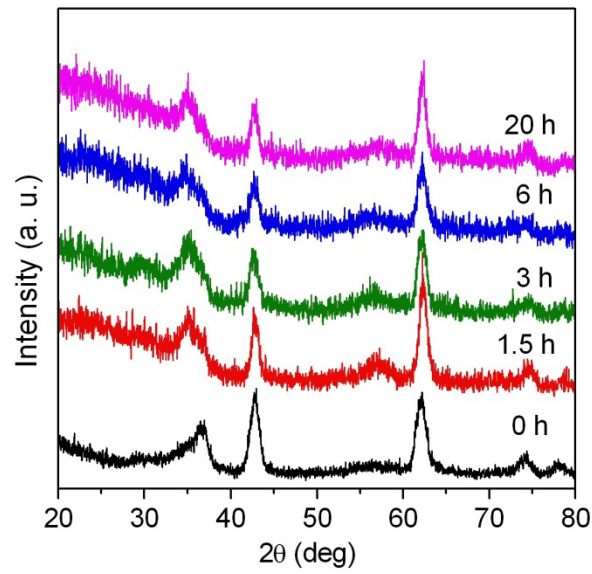

**Fig. S4.** XRD patterns of products of expedited oxidation.

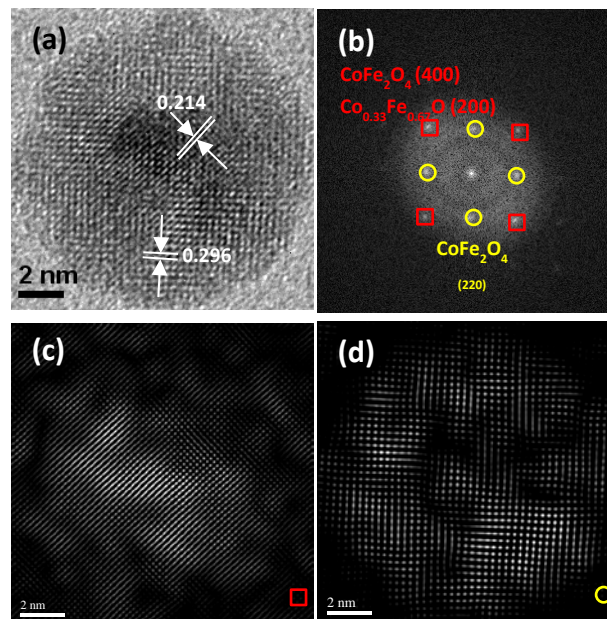

**Fig. S5.** The electron diffraction pattern of a single particle in the 20-h sample was used to further analyze the phase distribution.

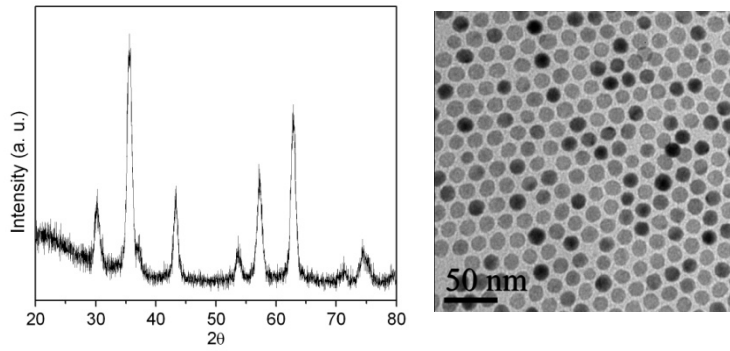

**Fig. S6.** XRD and TEM of the fully oxidized 12.5 nm  $\text{CoFe}_2\text{O}_4$  sample.

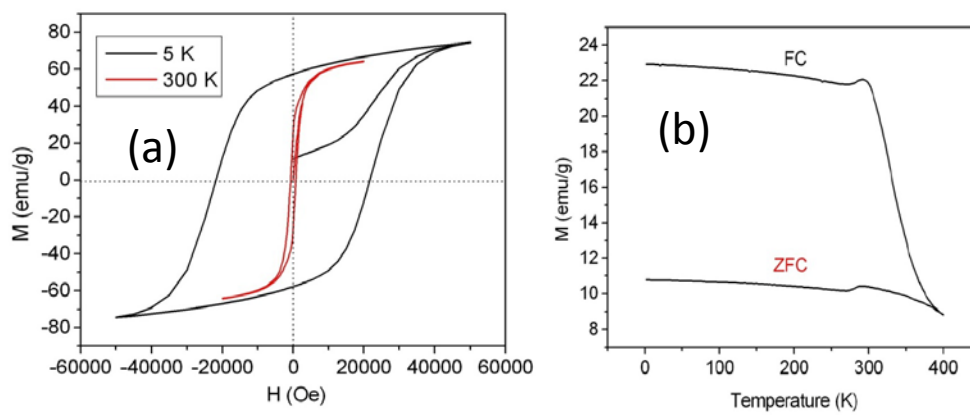

**Fig. S7.** The hysteresis loop (a) and temperature-dependent magnetization curve (b) of the fully oxidized 12.5 nm  $\text{CoFe}_2\text{O}_4$  sample.

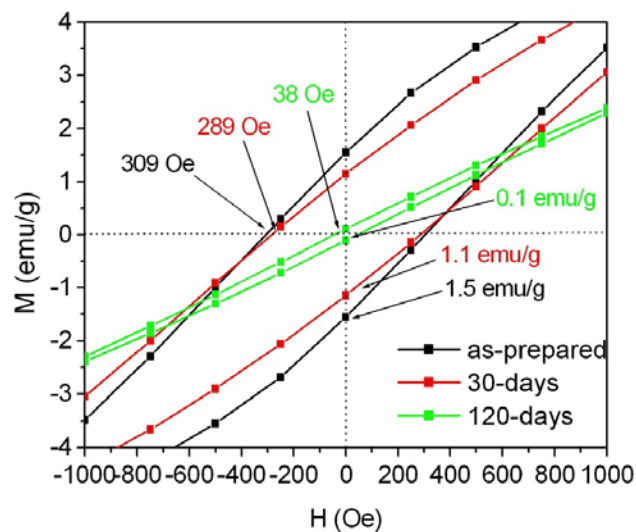

**Fig. S8.** The 300-K hysteresis loops of all three ambient oxidation samples show strong  $H_c$  and  $M_r$ .

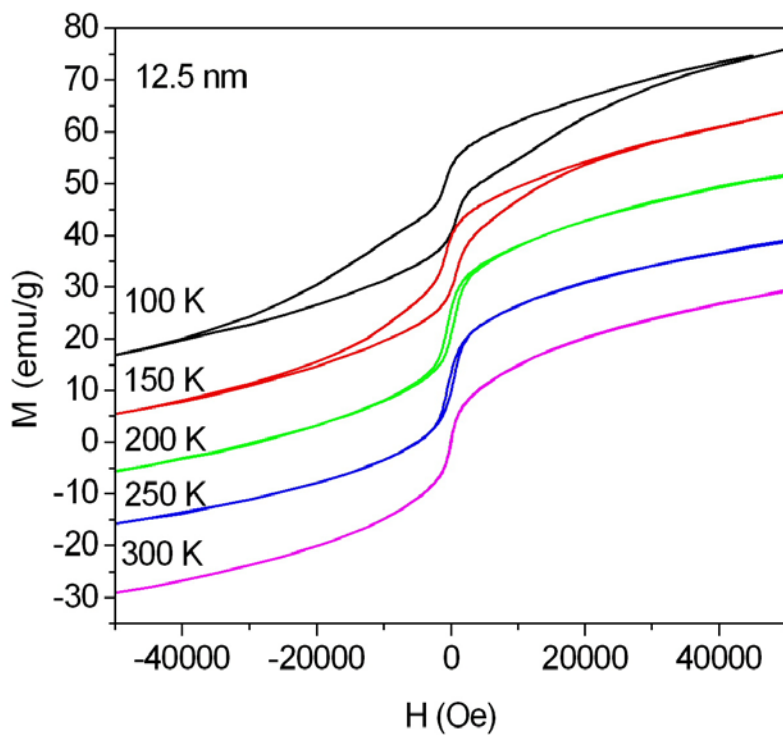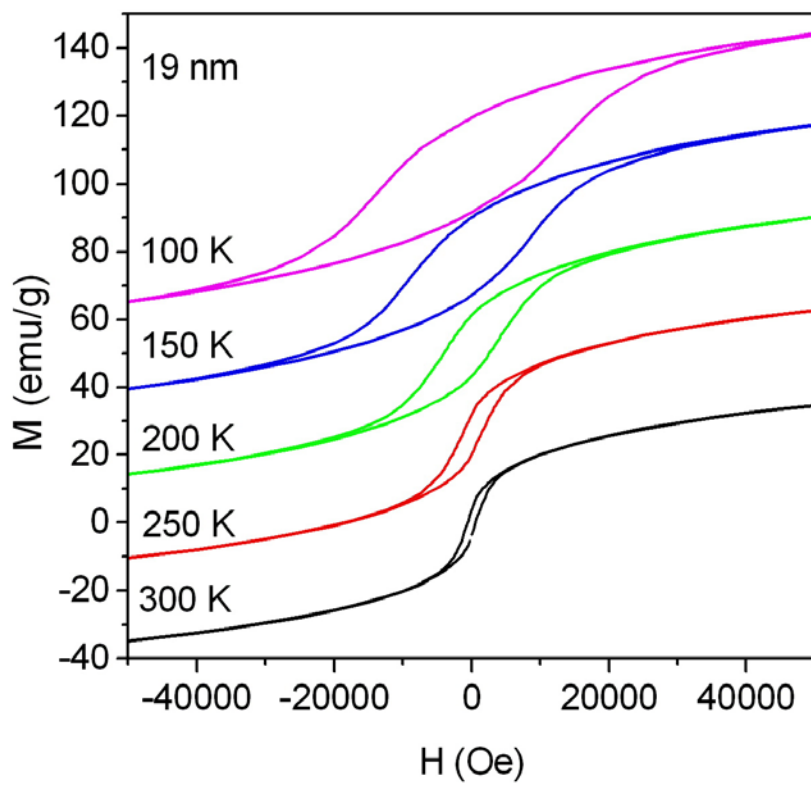



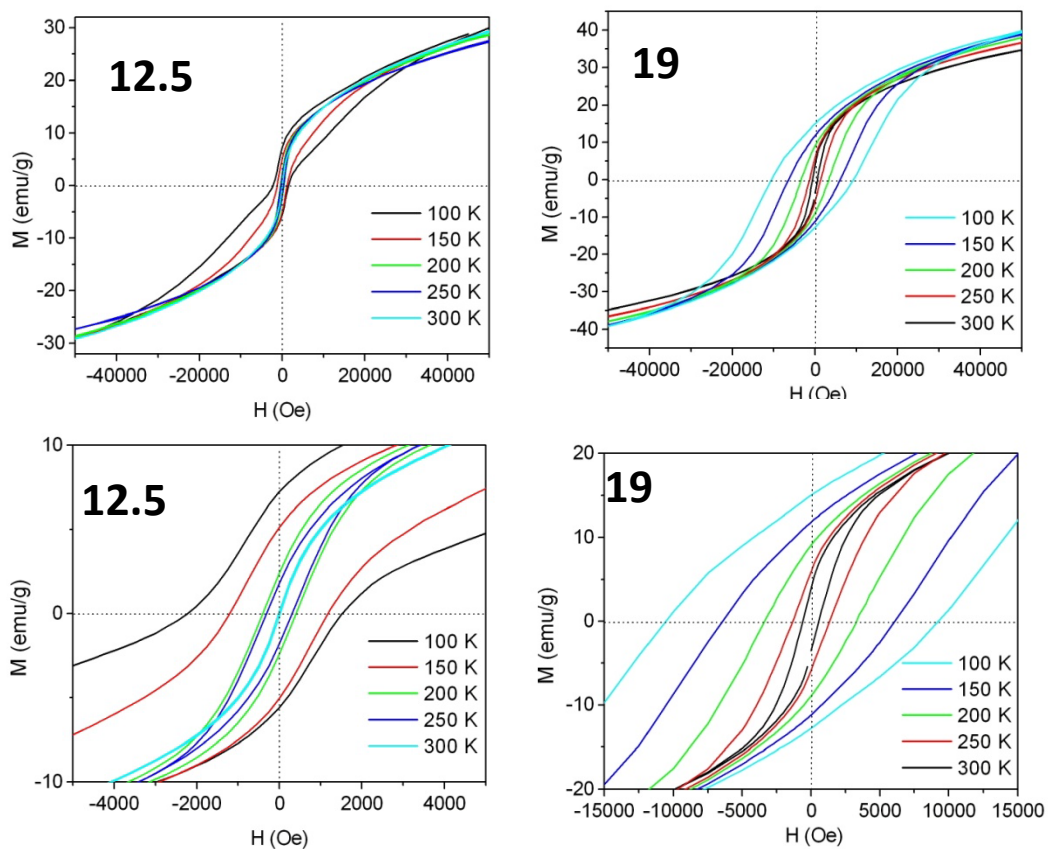

**Fig. S9.** The temperature-dependent hysteresis loops under FC (5 T) conditions at temperatures ranging from 100 K to 300 K with a step size of 50 K for products of 20-h expedited oxidation samples.

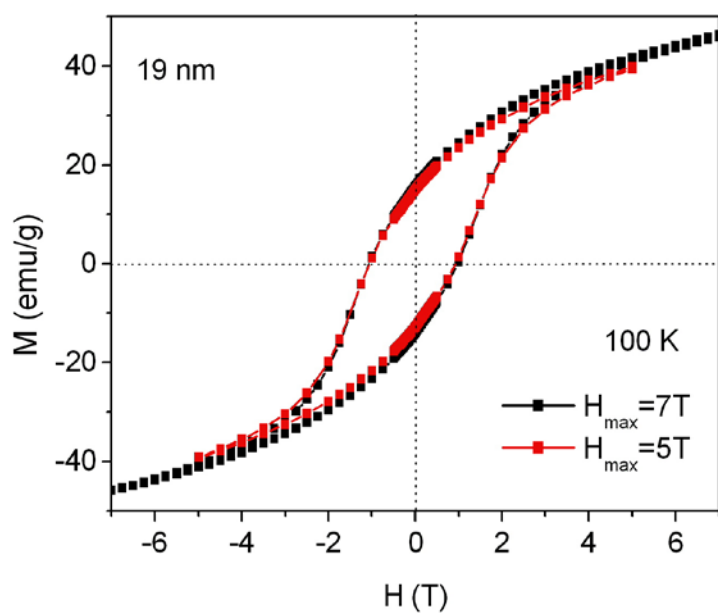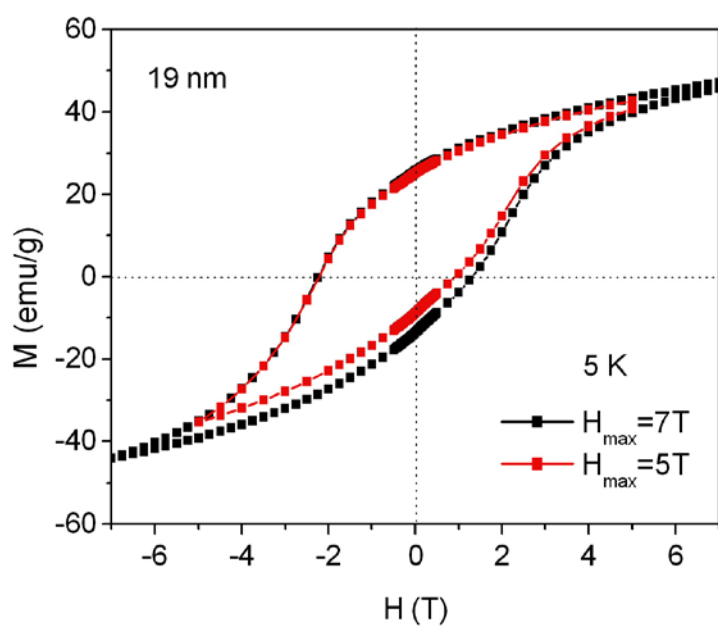

**Figure S10.** The hysteresis loops under FC (5 T and 7T) conditions at 5K and 100 K show similar  $H_{\text{irr}}$  indicating the magnetic field 5 T is sufficient to saturate the shell even at low temperature.
